# Supplementary material for: Growth-dependent heterogeneity in the DNA damage response in Escherichia coli
Source: bioRxiv or medRxiv preprint supplement (doi:10.1101/2021.05.06.442821), 2021-05-10
Supplement: Supplementary file [file media-2.pdf]

|                                     |         |       |   |      |       |       |      |       |       |
|-------------------------------------|---------|-------|---|------|-------|-------|------|-------|-------|
| Pop fraction PsfIA-GFP >= 15 [a.u.] | eSJR292 | lexA3 | 0 | 0    | 0     | 0     | 0    | 0     | 0     |
| Pop fraction PsfIA-GFP >= 15 [a.u.] | eSJR206 | wt    | 0 | 0,07 | 0,037 | 0,006 | 0,01 | 0,005 | 0,002 |
| Pop fraction PsfIA-GFP >= 15 [a.u.] | eSJR301 | r-pal | 0 | 0,26 | 0,222 | 0,014 | 0,05 | 0,009 | 0,008 |
| Pop fraction PsfIA-GFP >= 15 [a.u.] | eSJR214 | l-pal | 0 | 2,4  | 2,29  | 0,3   | 0,2  | 0,08  | 0,06  |
| Pop fraction PsfIA-GFP >= 15 [a.u.] | eSJR302 | 2-pal | 0 | 3,1  | 2,7   | 0,5   | 0,3  | 0,3   | 0,1   |
| Pop fraction PsfIA-GFP >= 15 [a.u.] | eSJR206 | wt    | 1 | 0,49 | 0,39  | 0,039 | 0,06 | 0,05  | 0,006 |
| Pop fraction PsfIA-GFP >= 15 [a.u.] | eSJR206 | wt    | 2 | 1,5  | 1,1   | 0,07  | 0,2  | 0,3   | 0,02  |
| Pop fraction PsfIA-GFP >= 15 [a.u.] | eSJR206 | wt    | 3 | 3    | 1,6   | 0,4   | 0,3  | 0,2   | 0,2   |

**Constitutive expression [A.U.]**

|                         |         |         |   |      |      |      |      |      |      |
|-------------------------|---------|---------|---|------|------|------|------|------|------|
| Mean PtetO-mKate [a.u.] | eSJR203 | wt-auto | 0 | 1,89 | 1,56 | 0,96 | 0,1  | 0,05 | 0,02 |
| Mean PtetO-mKate [a.u.] | eSJR292 | lexA3   | 0 | 1,89 | 1,47 | 1,01 | 0,05 | 0,04 | 0,02 |
| Mean PtetO-mKate [a.u.] | eSJR206 | wt      | 0 | 1,8  | 1,47 | 1    | 0,04 | 0,03 | 0,06 |
| Mean PtetO-mKate [a.u.] | eSJR301 | r-pal   | 0 | 2,11 | 1,62 | 1,18 | 0,04 | 0,02 | 0,05 |
| Mean PtetO-mKate [a.u.] | eSJR214 | l-pal   | 0 | 1,94 | 1,58 | 1,05 | 0,07 | 0,03 | 0,04 |
| Mean PtetO-mKate [a.u.] | eSJR302 | 2-pal   | 0 | 2,6  | 1,83 | 1,32 | 0,1  | 0,01 | 0,05 |
| Mean PtetO-mKate [a.u.] | eSJR206 | wt      | 1 | 1,9  | 1,54 | 1,01 | 0,2  | 0,03 | 0,06 |
| Mean PtetO-mKate [a.u.] | eSJR206 | wt      | 2 | 1,9  | 1,54 | 0,96 | 0,1  | 0,06 | 0,07 |
| Mean PtetO-mKate [a.u.] | eSJR206 | wt      | 3 | 2,1  | 1,58 | 1,06 | 0,3  | 0,02 | 0,05 |

**Cell size**

|                       |         |         |   |      |      |      |      |      |      |
|-----------------------|---------|---------|---|------|------|------|------|------|------|
| Mean cell size [um^2] | eSJR203 | wt-auto | 0 | 1,56 | 1,71 | 2,67 | 0,03 | 0,02 | 0,07 |
| Mean cell size [um^2] | eSJR292 | lexA3   | 0 | 1,46 | 1,69 | 2,5  | 0,02 | 0,05 | 0,2  |
| Mean cell size [um^2] | eSJR206 | wt      | 0 | 1,49 | 1,68 | 2,47 | 0,04 | 0,02 | 0,1  |
| Mean cell size [um^2] | eSJR301 | r-pal   | 0 | 1,62 | 1,73 | 2,61 | 0,04 | 0,01 | 0,07 |
| Mean cell size [um^2] | eSJR214 | l-pal   | 0 | 1,79 | 1,98 | 3,2  | 0,09 | 0,01 | 0,07 |
| Mean cell size [um^2] | eSJR302 | 2-pal   | 0 | 1,68 | 1,99 | 3,78 | 0,08 | 0,05 | 0,08 |
| Mean cell size [um^2] | eSJR206 | wt      | 1 | 1,66 | 2,03 | 3,2  | 0,02 | 0,06 | 0,1  |
| Mean cell size [um^2] | eSJR206 | wt      | 2 | 1,94 | 2,83 | 4,3  | 0,04 | 0,09 | 0,1  |
| Mean cell size [um^2] | eSJR206 | wt      | 3 | 2,3  | 4,67 | 6,4  | 0,1  | 0,07 | 0,4  |

**Estimation of alpha for different SOS thresholds**

| strainID                    | Strain  | Cipro | alpha [1/h] | err    |        |
|-----------------------------|---------|-------|-------------|--------|--------|
| Model PsfIA-GFP threshold 4 | eSJR206 | wt    | 0           | 0,0015 | 0,0002 |
| Model PsfIA-GFP threshold 4 | eSJR301 | r-pal | 0           | 0,021  | 0,003  |
| Model PsfIA-GFP threshold 4 | eSJR214 | l-pal | 0           | 0,052  | 0,008  |
| Model PsfIA-GFP threshold 4 | eSJR302 | 2-pal | 0           | 0,08   | 0,01   |
| Model PsfIA-GFP threshold 4 | eSJR206 | wt    | 1           | 0,011  | 0,003  |
| Model PsfIA-GFP threshold 4 | eSJR206 | wt    | 2           | 0,04   | 0,01   |
| Model PsfIA-GFP threshold 4 | eSJR206 | wt    | 3           | 0,09   | 0,03   |

**Relative distance to model [%]**

| strainID                    | Strain  | Cipro | Relative distance to model [%] |     |        | error |     |        |    |
|-----------------------------|---------|-------|--------------------------------|-----|--------|-------|-----|--------|----|
|                             |         |       | gly                            | glu | glu+aa | gly   | glu | glu+aa |    |
| Model PsfIA-GFP threshold 4 | eSJR206 | wt    | 0                              | 10  | -14    | -40   | 10  | 7      | 10 |
| Model PsfIA-GFP threshold 4 | eSJR301 | r-pal | 0                              | -2  | 9      | -10   | 7   | 8      | 30 |
| Model PsfIA-GFP threshold 4 | eSJR214 | l-pal | 0                              | -6  | 27     | -20   | 3   | 6      | 20 |
| Model PsfIA-GFP threshold 4 | eSJR302 | 2-pal | 0                              | -10 | 10     | 10    | 10  | 20     | 20 |
| Model PsfIA-GFP threshold 4 | eSJR206 | wt    | 1                              | -10 | 10     | 10    | 10  | 20     | 20 |
| Model PsfIA-GFP threshold 4 | eSJR206 | wt    | 2                              | -12 | 60     | -37   | 8   | 20     | 5  |
| Model PsfIA-GFP threshold 4 | eSJR206 | wt    | 3                              | -14 | 70     | -44   | 6   | 20     | 7  |
| Model PsfIA-GFP threshold 4 | eSJR206 | wt    | 3                              | -10 | 50     | -47   | 20  | 20     | 5  |

**alpha err**

|                             |         |       |   |        |        |
|-----------------------------|---------|-------|---|--------|--------|
| Model PsfIA-GFP threshold 6 | eSJR206 | wt    | 0 | 0,0009 | 0,0001 |
| Model PsfIA-GFP threshold 6 | eSJR301 | r-pal | 0 | 0,014  | 0,002  |
| Model PsfIA-GFP threshold 6 | eSJR214 | l-pal | 0 | 0,035  | 0,006  |
| Model PsfIA-GFP threshold 6 | eSJR302 | 2-pal | 0 | 0,048  | 0,007  |
| Model PsfIA-GFP threshold 6 | eSJR206 | wt    | 1 | 0,007  | 0,002  |
| Model PsfIA-GFP threshold 6 | eSJR206 | wt    | 2 | 0,021  | 0,005  |
| Model PsfIA-GFP threshold 6 | eSJR206 | wt    | 3 | 0,039  | 0,008  |

**Relative distance to model [%]**

| strainID                    | Strain  | Cipro | Relative distance to model [%] |     |        | error |     |        |    |
|-----------------------------|---------|-------|--------------------------------|-----|--------|-------|-----|--------|----|
|                             |         |       | gly                            | glu | glu+aa | gly   | glu | glu+aa |    |
| Model PsfIA-GFP threshold 6 | eSJR206 | wt    | 0                              | 10  | -7     | -60   | 8   | 9      | 10 |
| Model PsfIA-GFP threshold 6 | eSJR301 | r-pal | 0                              | 2   | 13     | -40   | 9   | 6      | 10 |
| Model PsfIA-GFP threshold 6 | eSJR214 | l-pal | 0                              | -1  | 25     | -53   | 5   | 2      | 8  |
| Model PsfIA-GFP threshold 6 | eSJR302 | 2-pal | 0                              | 1   | 10     | -34   | 7   | 10     | 9  |
| Model PsfIA-GFP threshold 6 | eSJR206 | wt    | 1                              | -5  | 40     | -52   | 5   | 20     | 4  |
| Model PsfIA-GFP threshold 6 | eSJR206 | wt    | 2                              | -1  | 40     | -61   | 7   | 20     | 7  |
| Model PsfIA-GFP threshold 6 | eSJR206 | wt    | 3                              | 10  | 10     | -51   | 10  | 10     | 8  |

**alpha err**

|                              |         |       |   |         |         |
|------------------------------|---------|-------|---|---------|---------|
| Model PsfIA-GFP threshold 10 | eSJR206 | wt    | 0 | 0,00053 | 0,00009 |
| Model PsfIA-GFP threshold 10 | eSJR301 | r-pal | 0 | 0,005   | 0,001   |
| Model PsfIA-GFP threshold 10 | eSJR214 | l-pal | 0 | 0,02    | 0,005   |
| Model PsfIA-GFP threshold 10 | eSJR302 | 2-pal | 0 | 0,026   | 0,005   |
| Model PsfIA-GFP threshold 10 | eSJR206 | wt    | 1 | 0,0038  | 0,0009  |
| Model PsfIA-GFP threshold 10 | eSJR206 | wt    | 2 | 0,012   | 0,003   |
| Model PsfIA-GFP threshold 10 | eSJR206 | wt    | 3 | 0,021   | 0,004   |

**Relative distance to model [%]**

| strainID                     | Strain  | Cipro | Relative distance to model [%] |     |        | error |     |        |    |
|------------------------------|---------|-------|--------------------------------|-----|--------|-------|-----|--------|----|
|                              |         |       | gly                            | glu | glu+aa | gly   | glu | glu+aa |    |
| Model PsfIA-GFP threshold 10 | eSJR206 | wt    | 0                              | 10  | 10     | -71   | 10  | 10     | 10 |
| Model PsfIA-GFP threshold 10 | eSJR301 | r-pal | 0                              | 0   | 32     | -74   | 20  | 4      | 10 |
| Model PsfIA-GFP threshold 10 | eSJR214 | l-pal | 0                              | -3  | 35     | -64   | 8   | 4      | 3  |
| Model PsfIA-GFP threshold 10 | eSJR302 | 2-pal | 0                              | 2   | 30     | -55   | 7   | 10     | 9  |
| Model PsfIA-GFP threshold 10 | eSJR206 | wt    | 1                              | 0   | 40     | -65   | 5   | 10     | 7  |
| Model PsfIA-GFP threshold 10 | eSJR206 | wt    | 2                              | 5   | 30     | -77   | 10  | 20     | 5  |
| Model PsfIA-GFP threshold 10 | eSJR206 | wt    | 3                              | 10  | 0      | -60   | 10  | 10     | 10 |

**alpha err**

|                              |         |       |   |        |         |
|------------------------------|---------|-------|---|--------|---------|
| Model PsfIA-GFP threshold 12 | eSJR206 | wt    | 0 | 0,0004 | 0,00007 |
| Model PsfIA-GFP threshold 12 | eSJR301 | r-pal | 0 | 0,0026 | 0,0009  |
| Model PsfIA-GFP threshold 12 | eSJR214 | l-pal | 0 | 0,016  | 0,004   |
| Model PsfIA-GFP threshold 12 | eSJR302 | 2-pal | 0 | 0,02   | 0,004   |
| Model PsfIA-GFP threshold 12 | eSJR206 | wt    | 1 | 0,003  | 0,0007  |
| Model PsfIA-GFP threshold 12 | eSJR206 | wt    | 2 | 0,009  | 0,002   |
| Model PsfIA-GFP threshold 12 | eSJR206 | wt    | 3 | 0,016  | 0,003   |

**Relative distance to model [%]**

| strainID                     | Strain  | Cipro | Relative distance to model [%] |     |        | error |     |        |    |
|------------------------------|---------|-------|--------------------------------|-----|--------|-------|-----|--------|----|
|                              |         |       | gly                            | glu | glu+aa | gly   | glu | glu+aa |    |
| Model PsfIA-GFP threshold 12 | eSJR206 | wt    | 0                              | 10  | 0      | -70   | 10  | 10     | 10 |
| Model PsfIA-GFP threshold 12 | eSJR301 | r-pal | 0                              | 0   | 42     | -80   | 20  | 5      | 10 |
| Model PsfIA-GFP threshold 12 | eSJR214 | l-pal | 0                              | -5  | 42     | -66   | 7   | 5      | 5  |
| Model PsfIA-GFP threshold 12 | eSJR302 | 2-pal | 0                              | -1  | 30     | -57   | 9   | 10     | 9  |
| Model PsfIA-GFP threshold 12 | eSJR206 | wt    | 1                              | 2   | 40     | -73   | 6   | 10     | 5  |
| Model PsfIA-GFP threshold 12 | eSJR206 | wt    | 2                              | 10  | 30     | -81   | 10  | 20     | 3  |
| Model PsfIA-GFP threshold 12 | eSJR206 | wt    | 3                              | 10  | 0      | -60   | 10  | 10     | 20 |

**alpha err**

|                              |         |       |   |        |         |
|------------------------------|---------|-------|---|--------|---------|
| Model PsfIA-GFP threshold 14 | eSJR206 | wt    | 0 | 0,0003 | 0,00006 |
| Model PsfIA-GFP threshold 14 | eSJR301 | r-pal | 0 | 0,0014 | 0,0005  |
| Model PsfIA-GFP threshold 14 | eSJR214 | l-pal | 0 | 0,012  | 0,003   |
| Model PsfIA-GFP threshold 14 | eSJR302 | 2-pal | 0 | 0,015  | 0,004   |
| Model PsfIA-GFP threshold 14 | eSJR206 | wt    | 1 | 0,0023 | 0,0006  |
| Model PsfIA-GFP threshold 14 | eSJR206 | wt    | 2 | 0,007  | 0,002   |
| Model PsfIA-GFP threshold 14 | eSJR206 | wt    | 3 | 0,013  | 0,003   |

**Relative distance to model [%]**

| strainID                     | Strain  | Cipro | Relative distance to model [%] |     |        | error |     |        |    |
|------------------------------|---------|-------|--------------------------------|-----|--------|-------|-----|--------|----|
|                              |         |       | gly                            | glu | glu+aa | gly   | glu | glu+aa |    |
| Model PsfIA-GFP threshold 14 | eSJR206 | wt    | 0                              | 10  | 0      | -74   | 10  | 10     | 8  |
| Model PsfIA-GFP threshold 14 | eSJR301 | r-pal | 0                              | 0   | 44,2   | -84   | 20  | 0,7    | 8  |
| Model PsfIA-GFP threshold 14 | eSJR214 | l-pal | 0                              | -8  | 53     | -67   | 8   | 6      | 5  |
| Model PsfIA-GFP threshold 14 | eSJR302 | 2-pal | 0                              | -3  | 40     | -58   | 9   | 10     | 8  |
| Model PsfIA-GFP threshold 14 | eSJR206 | wt    | 1                              | -1  | 40     | -72   | 9   | 20     | 5  |
| Model PsfIA-GFP threshold 14 | eSJR206 | wt    | 2                              | 10  | 30     | -86   | 10  | 30     | 4  |
| Model PsfIA-GFP threshold 14 | eSJR206 | wt    | 3                              | 11  | 0      | -70   | 10  | 10     | 20 |
