# Supplementary material for: Growth-dependent heterogeneity in the DNA damage response in Escherichia coli
Source: bioRxiv or medRxiv preprint supplement (doi:10.1101/2021.05.06.442821), 2021-05-10
Supplement: Supplementary file [file media-3.pdf]

| List of values as support in the main text |          |        |          |          |          |       |       |       |
|--------------------------------------------|----------|--------|----------|----------|----------|-------|-------|-------|
| Metric                                     | StrainID | Strain | media    |          |          |       |       |       |
|                                            |          |        | gly      | glu      | glu+aa   |       |       |       |
| Experiment ID                              | eSJR206  | WT     | 20200201 | 20191020 | 20190818 |       |       |       |
|                                            | eSJR206  | WT     | 20200212 | 20200314 | 20190828 |       |       |       |
|                                            | eSJR206  | WT     | 20200221 |          | 20200321 |       |       |       |
|                                            | eSJR302  | 2pal   | 20200201 | 20191020 | 20190818 |       |       |       |
|                                            | eSJR302  | 2pal   | 20200212 | 20191111 | 20190828 |       |       |       |
|                                            | eSJR302  | 2pal   | 20200221 | 20200314 | 20200321 |       |       |       |
| Imaging interval [h]                       | eSJR206  | WT     | 0,13     | 0,13     | 0,083    |       |       |       |
|                                            | eSJR206  | WT     | 0,13     | 0,13     | 0,083    |       |       |       |
|                                            | eSJR206  | WT     | 0,2      |          | 0,083    |       |       |       |
|                                            | eSJR302  | 2pal   | 0,13     | 0,13     | 0,083    |       |       |       |
|                                            | eSJR302  | 2pal   | 0,13     | 0,13     | 0,083    |       |       |       |
|                                            | eSJR302  | 2pal   | 0,2      | 0,13     | 0,083    |       |       |       |
| Tracking time [h]                          | eSJR206  | WT     | 20       | 21       | 12       |       |       |       |
|                                            | eSJR206  | WT     | 11       | 17       | 13       |       |       |       |
|                                            | eSJR206  | WT     | 42       |          | 15       |       |       |       |
|                                            | eSJR302  | 2pal   | 23       | 20       | 10       |       |       |       |
|                                            | eSJR302  | 2pal   | 22       | 22       | 15       |       |       |       |
|                                            | eSJR302  | 2pal   | 26       | 9,2      | 15       |       |       |       |
| Number of lineages                         | eSJR206  | WT     | 45       | 56       | 83       |       |       |       |
|                                            | eSJR206  | WT     | 247      | 33       | 194      |       |       |       |
|                                            | eSJR206  | WT     | 212      |          | 140      |       |       |       |
|                                            | eSJR302  | 2pal   | 92       | 366      | 172      |       |       |       |
|                                            | eSJR302  | 2pal   | 63       | 249      | 277      |       |       |       |
|                                            | eSJR302  | 2pal   | 448      | 284      | 160      |       |       |       |
| Number of division recorded                | eSJR206  | WT     | 163      | 506      | 1179     |       |       |       |
|                                            | eSJR206  | WT     | 611      | 341      | 3032     |       |       |       |
|                                            | eSJR206  | WT     | 2569     |          | 2382     |       |       |       |
|                                            | eSJR302  | 2pal   | 151      | 1647     | 776      |       |       |       |
|                                            | eSJR302  | 2pal   | 106      | 2069     | 1824     |       |       |       |
|                                            | eSJR302  | 2pal   | 1115     | 517      | 1150     |       |       |       |
| Division time [h]                          |          |        | avg      |          |          | err   |       |       |
|                                            | eSJR206  | WT     | 3,7      | 1,56     | 0,63     | 1,5   | 0,97  | 0,3   |
|                                            | eSJR206  | WT     | 2,64     | 1,21     | 0,67     | 0,66  | 0,53  | 0,36  |
|                                            | eSJR206  | WT     | 2,8      |          | 0,63     | 1,5   |       | 0,32  |
|                                            | eSJR302  | 2pal   | 5,8      | 2,3      | 1,28     | 3,1   | 1,3   | 0,54  |
|                                            | eSJR302  | 2pal   | 5,5      | 1,5      | 1,37     | 2,4   | 0,81  | 0,59  |
| Length at birth [µm]                       |          |        | avg      |          |          | err   |       |       |
|                                            | eSJR206  | WT     | 1,39     | 2,17     | 2,61     | 0,2   | 0,98  | 0,79  |
|                                            | eSJR206  | WT     | 1,7      | 1,67     | 2,47     | 0,21  | 0,25  | 0,68  |
|                                            | eSJR206  | WT     | 1,6      |          | 2,33     | 0,22  |       | 0,74  |
|                                            | eSJR302  | 2pal   | 1,58     | 2,8      | 2,1      | 0,24  | 2,3   | 1,3   |
|                                            | eSJR302  | 2pal   | 1,88     | 1,81     | 1,71     | 0,65  | 0,65  | 0,96  |
| Length at division [µm]                    |          |        | avg      |          |          | err   |       |       |
|                                            | eSJR206  | WT     | 2,94     | 4,1      | 4,9      | 0,42  | 1,4   | 1,3   |
|                                            | eSJR206  | WT     | 3,39     | 3,3      | 4,7      | 0,4   | 1,2   | 1,3   |
|                                            | eSJR206  | WT     | 3,21     |          | 4,4      | 0,41  |       | 1,3   |
|                                            | eSJR302  | 2pal   | 3,38     | 5,5      | 4,1      | 0,49  | 3,6   | 2,4   |
|                                            | eSJR302  | 2pal   | 3,9      | 3,6      | 3,4      | 1     | 1,2   | 1,6   |
| Elongation rate-length [/h]                |          |        | avg      |          |          | err   |       |       |
|                                            | eSJR206  | WT     | 0,214    | 0,47     | 1,07     | 0,062 | 0,15  | 0,27  |
|                                            | eSJR206  | WT     | 0,255    | 0,57     | 1,04     | 0,05  | 0,14  | 0,28  |
|                                            | eSJR206  | WT     | 0,274    |          | 1,09     | 0,084 |       | 0,28  |
|                                            | eSJR302  | 2pal   | 0,144    | 0,321    | 0,58     | 0,055 | 0,093 | 0,19  |
|                                            | eSJR302  | 2pal   | 0,146    | 0,49     | 0,54     | 0,055 | 0,15  | 0,2   |
| Elongation rate-length R <sup>2</sup>      |          |        | avg      |          |          | err   |       |       |
|                                            | eSJR206  | WT     | 0,951    | 0,945    | 0,977    | 0,036 | 0,061 | 0,053 |
|                                            | eSJR206  | WT     | 0,963    | 0,951    | 0,977    | 0,026 | 0,069 | 0,042 |
|                                            | eSJR206  | WT     | 0,961    |          | 0,976    | 0,042 |       | 0,031 |
|                                            | eSJR302  | 2pal   | 0,93     | 0,949    | 0,958    | 0,12  | 0,077 | 0,052 |
|                                            | eSJR302  | 2pal   | 0,952    | 0,946    | 0,953    | 0,038 | 0,066 | 0,071 |
| Cell-cycle mean PsfIA-GFP [a.u.]           |          |        | avg      |          |          | err   |       |       |
|                                            | eSJR206  | WT     | 0,89     | 1,11     | 1,04     | 0,9   | 0,27  | 0,22  |
|                                            | eSJR206  | WT     | 0,84     | 0,88     | 0,96     | 0,44  | 0,47  | 0,24  |
|                                            | eSJR206  | WT     | 0,84     |          | 1,01     | 0,41  |       | 0,41  |
|                                            | eSJR302  | 2pal   | 0,9      | 1,34     | 1,28     | 0,22  | 0,34  | 0,43  |
|                                            | eSJR302  | 2pal   | 1,14     | 1,48     | 1,23     | 0,93  | 0,83  | 0,46  |
| Cell-cycle mean PtetO-mKate [a.u.]         |          |        | avg      |          |          | err   |       |       |
|                                            | eSJR206  | WT     | 1,7      | 1,44     | 0,73     | 0,29  | 0,29  | 0,28  |
|                                            | eSJR206  | WT     | 1,85     | 1,66     | 0,79     | 0,25  | 0,32  | 0,31  |
|                                            | eSJR206  | WT     | 1,98     |          | 1,15     | 0,45  |       | 0,48  |
|                                            | eSJR302  | 2pal   | 1,91     | 2,23     | 1,42     | 0,37  | 0,44  | 0,38  |
|                                            | eSJR302  | 2pal   | 2,19     | 1,95     | 1,48     | 0,39  | 0,45  | 0,35  |
| eSJR302                                    | 2pal     | 2,19   | 1,87     | 1,62     | 0,42     | 0,34  | 0,32  |       |

Estimated population growth rate / Lambda1 [1/h]

|         |      |          |          |          |
|---------|------|----------|----------|----------|
| eSJR206 | WT   | 0,206138 | 0,53244  | 1,244227 |
| eSJR206 | WT   | 0,278917 | 0,644807 | 1,171849 |
| eSJR206 | WT   | 0,284915 |          | 1,250625 |
| eSJR302 | 2pal | 0,13496  | 0,351295 | 0,614416 |
| eSJR302 | 2pal | 0,13496  | 0,53284  | 0,564831 |
| eSJR302 | 2pal | 0,160552 | 0,378487 | 0,724383 |

| avg      |          |          | err      |          |          |
|----------|----------|----------|----------|----------|----------|
| 0,256657 | 0,588624 | 1,222233 | 0,025318 | 0,056183 | 0,02526  |
| 0,143491 | 0,420874 | 0,634543 | 0,008531 | 0,056531 | 0,047145 |

Estimated doubling-rate [dbl/h]

|         |      |          |          |          |
|---------|------|----------|----------|----------|
| eSJR206 | WT   | 0,297395 | 0,768149 | 1,79504  |
| eSJR206 | WT   | 0,402392 | 0,93026  | 1,69062  |
| eSJR206 | WT   | 0,411045 |          | 1,80427  |
| eSJR302 | 2pal | 0,194706 | 0,506811 | 0,886415 |
| eSJR302 | 2pal | 0,194706 | 0,768726 | 0,814879 |
| eSJR302 | 2pal | 0,231628 | 0,546041 | 1,045064 |

| avg      |          |          | err      |          |          |
|----------|----------|----------|----------|----------|----------|
| 0,370277 | 0,849204 | 1,76331  | 0,036527 | 0,081055 | 0,036443 |
| 0,207013 | 0,607193 | 0,915452 | 0,012307 | 0,081557 | 0,068016 |

Alpha SOS>5 [1/h]

|         |      |        |       |       |
|---------|------|--------|-------|-------|
| eSJR302 | 2pal | 0,0091 | 0,017 | 0,033 |
| eSJR302 | 2pal | 0,0116 | 0,028 | 0,029 |
| eSJR302 | 2pal | 0,013  | 0,029 | 0,038 |

Estimated f2 SOS>5 [fraction]

|         |      |          |          |          |
|---------|------|----------|----------|----------|
| eSJR302 | 2pal | 0,067427 | 0,048392 | 0,05371  |
| eSJR302 | 2pal | 0,085952 | 0,052549 | 0,051343 |
| eSJR302 | 2pal | 0,080971 | 0,076621 | 0,052458 |

| avg      |          |          | err      |          |          |
|----------|----------|----------|----------|----------|----------|
| 0,078117 | 0,059187 | 0,052504 | 0,005535 | 0,008799 | 0,000684 |

RAW DATA

Alphaestimates

| strain | media | date     | nbhow_5 OS_5 | nbhow_5 OS_5 | alpha_mn kM_5OS_5 SOS_5 | alpha_p5 SOS_5 | alpha_p95 SOS_5 | nbhow_5 OS_6 | nbhow_5 OS_6 | alpha_mn kM_5OS_6 SOS_6 | alpha_p5 SOS_6 | alpha_p95 SOS_6 | nbhow_5 OS_7 | nbhow_5 OS_7 | alpha_mn kM_5OS_7 SOS_7 | alpha_p5 SOS_7 | alpha_p95 SOS_7 | nbhow_5 OS_8 | nbhow_5 OS_8 | alpha_mn kM_5OS_8 SOS_8 | alpha_p5 SOS_8 | alpha_p95 SOS_8 | nbhow_5 OS_9 | nbhow_5 OS_9 | alpha_mn kM_5OS_9 SOS_9 | alpha_p5 SOS_9 | alpha_p95 SOS_9 | nbhow_5 OS_10 | nbhow_5 OS_10 |
|--------|-------|----------|--------------|--------------|-------------------------|----------------|-----------------|--------------|--------------|-------------------------|----------------|-----------------|--------------|--------------|-------------------------|----------------|-----------------|--------------|--------------|-------------------------|----------------|-----------------|--------------|--------------|-------------------------|----------------|-----------------|---------------|---------------|
| WT     | GYV   | 20200201 | 43           | 1            | 0.00115                 | 0.00051        | 0.00575         | 43           | 1            | 0.00115                 | 0.0005         | 0.0053          | 43           | 1            | 0.00115                 | 0.0005         | 0.0053          | 44           | 1            | 0.00112                 | 0.0005         | 0.00538         | 44           | 1            | 0.00112                 | 0.00049        | 0.00538         | 44            | 1             |
| WT     | GYV   | 20200212 | 237          | 8            | 0.0032                  | 0.0019         | 0.0057          | 237          | 8            | 0.0032                  | 0.0019         | 0.0057          | 238          | 7            | 0.0028                  | 0.0016         | 0.0052          | 240          | 6            | 0.0024                  | 0.0013         | 0.0047          | 240          | 6            | 0.0024                  | 0.0013         | 0.0047          | 240           | 6             |
| WT     | GYV   | 20200221 | 195          | 15           | 0.0018                  | 0.0012         | 0.0027          | 196          | 15           | 0.0018                  | 0.0012         | 0.0027          | 199          | 13           | 0.00152                 | 0.001          | 0.00241         | 201          | 11           | 0.00128                 | 0.00083        | 0.00213         | 203          | 9            | 0.00105                 | 0.00066        | 0.00184         | 203           | 9             |
| WT     | GYV   | 20191020 | 55           | 1            | 0.00097                 | 0.00044        | 0.00465         | 55           | 1            | 0.00097                 | 0.00044        | 0.00462         | 55           | 1            | 0.00097                 | 0.00045        | 0.00482         | 55           | 1            | 0.00097                 | 0.00043        | 0.00476         | 56           | 0            | 0.00075                 | 0.00046        | 56              | 0             |               |
| WT     | GYV   | 20200314 | 31           | 2            | 0.0039                  | 0.0016         | 0.019           | 32           | 1            | 0.00194                 | 0.00081        | 0.00925         | 32           | 1            | 0.00194                 | 0.00078        | 0.00914         | 32           | 1            | 0.00194                 | 0.00078        | 0.00881         | 32           | 1            | 0.00194                 | 0.0008         | 0.00865         | 32            | 1             |
| WT     | GYV   | 20190818 | 83           | 0            | 0.00091                 | 0.00362        | 0.00346         | 83           | 0            | 0.00091                 | 0.003392       | 0.00345         | 83           | 0            | 0.00091                 | 0.003416       | 0.00345         | 83           | 0            | 0.00091                 | 0.003495       | 83              | 0            | 0.00091      | 0.003475                | 83             | 0               | 0.00091       | 0.003475      |
| WT     | GYV   | 20190828 | 190          | 4            | 0.00158                 | 0.00082        | 0.00362         | 192          | 2            | 0.00079                 | 0.00037        | 0.0025          | 192          | 2            | 0.00079                 | 0.00038        | 0.00254         | 192          | 2            | 0.00079                 | 0.00037        | 0.00251         | 192          | 2            | 0.00079                 | 0.00037        | 0.00251         | 192           | 2             |
| WT     | GYV   | 20200321 | 132          | 8            | 0.0004                  | 0.0026         | 0.0079          | 133          | 7            | 0.0039                  | 0.0022         | 0.0072          | 136          | 4            | 0.0022                  | 0.0011         | 0.005           | 137          | 3            | 0.00162                 | 0.0008         | 0.0042          | 138          | 2            | 0.00108                 | 0.00051        | 0.00345         | 138           | 2             |
| Zfal   | GYV   | 20200201 | 70           | 15           | 0.0091                  | 0.0061         | 0.0139          | 71           | 14           | 0.0084                  | 0.0055         | 0.0131          | 72           | 14           | 0.0083                  | 0.0054         | 0.013           | 73           | 13           | 0.0076                  | 0.0049         | 0.012           | 74           | 12           | 0.007                   | 0.004          | 0.0113          | 76            | 12            |
| Zfal   | GYV   | 20200212 | 44           | 12           | 0.0116                  | 0.0076         | 0.0191          | 44           | 12           | 0.0115                  | 0.0072         | 0.0191          | 48           | 9            | 0.0083                  | 0.0051         | 0.0146          | 49           | 8            | 0.0074                  | 0.0043         | 0.0128          | 50           | 7            | 0.0064                  | 0.0036         | 0.0114          | 51            | 7             |
| Zfal   | GYV   | 20200221 | 340          | 123          | 0.013                   | 0.011          | 0.015           | 320          | 113          | 0.012                   | 0.01           | 0.014           | 327          | 108          | 0.0112                  | 0.0096         | 0.0131          | 326          | 97           | 0.0102                  | 0.0086         | 0.012           | 321          | 92           | 0.0096                  | 0.0081         | 0.0114          | 321           | 92            |
| Zfal   | GYV   | 20191020 | 262          | 34           | 0.017                   | 0.014          | 0.02            | 267          | 30           | 0.018                   | 0.013          | 0.019           | 277          | 80           | 0.014                   | 0.011          | 0.016           | 280          | 77           | 0.013                   | 0.011          | 0.016           | 284          | 65           | 0.0108                  | 0.0088         | 0.0133          | 303           | 60            |
| Zfal   | GYV   | 20191111 | 134          | 113          | 0.028                   | 0.024          | 0.033           | 139          | 108          | 0.026                   | 0.022          | 0.031           | 148          | 99           | 0.024                   | 0.02           | 0.028           | 157          | 90           | 0.021                   | 0.018          | 0.025           | 164          | 83           | 0.019                   | 0.016          | 0.023           | 170           | 83            |
| Zfal   | GYV   | 20200314 | 208          | 60           | 0.029                   | 0.024          | 0.036           | 216          | 52           | 0.025                   | 0.02           | 0.031           | 218          | 50           | 0.024                   | 0.019          | 0.029           | 224          | 45           | 0.021                   | 0.017          | 0.027           | 229          | 41           | 0.019                   | 0.015          | 0.023           | 238           | 41            |
| Zfal   | GYV   | 20190818 | 118          | 45           | 0.033                   | 0.028          | 0.034           | 124          | 40           | 0.029                   | 0.023          | 0.037           | 128          | 37           | 0.026                   | 0.02           | 0.033           | 129          | 37           | 0.026                   | 0.019          | 0.034           | 132          | 34           | 0.023                   | 0.018          | 0.031           | 135           | 34            |
| Zfal   | GYV   | 20190828 | 178          | 96           | 0.029                   | 0.025          | 0.035           | 187          | 88           | 0.027                   | 0.022          | 0.032           | 194          | 81           | 0.024                   | 0.02           | 0.029           | 201          | 74           | 0.022                   | 0.018          | 0.028           | 205          | 71           | 0.021                   | 0.017          | 0.025           | 209           | 71            |
| Zfal   | GYV   | 20200321 | 93           | 62           | 0.038                   | 0.031          | 0.047           | 98           | 57           | 0.035                   | 0.028          | 0.044           | 102          | 53           | 0.032                   | 0.026          | 0.04            | 105          | 50           | 0.029                   | 0.023          | 0.038           | 106          | 50           | 0.029                   | 0.023          | 0.037           | 110           | 50            |



Mother machine data

| strain | media | date     | interval | tracking_t<br>time | n_lineages<br>n | truncate<br>d odd gr<br>own | n_division<br>n | division_t<br>me_avg | division_t<br>me_std | length_at<br>birth_avg | length_at<br>birth_std | division_1<br>vg | length_at<br>division_1<br>td | length_at<br>division_5 | length_gr<br>ate_avg | length_gr<br>ate_std | length_gr<br>ate_2_w | length_gr<br>ate_2_std | cellcycle<br>mean_gfp | cellcycle<br>mean_gfp<br>_std | cellcycle<br>mean_mnk | cellcycle<br>mean_mnk<br>_std | estimated<br>lambda_1 | average<br>lambda_1 | averagedoubling<br>rate |
|--------|-------|----------|----------|--------------------|-----------------|-----------------------------|-----------------|----------------------|----------------------|------------------------|------------------------|------------------|-------------------------------|-------------------------|----------------------|----------------------|----------------------|------------------------|-----------------------|-------------------------------|-----------------------|-------------------------------|-----------------------|---------------------|-------------------------|
| wt     | gfy   | 20200201 | 0.13     | 20                 | 45              | 3                           | 163             | 3.7                  | 1.5                  | 1.39                   | 1.29                   | 2.94             | 0.42                          | 0.42                    | 0.214                | 0.062                | 0.951                | 0.036                  | 0.89                  | 0.9                           | 1.7                   | 0.29                          | 0.205038              | 0.25657             | 0.370277                |
| wt     | gfy   | 20200212 | 0.13     | 11                 | 247             | 179                         | 611             | 2.64                 | 0.66                 | 1.17                   | 0.21                   | 3.39             | 0.4                           | 0.4                     | 0.253                | 0.05                 | 0.963                | 0.036                  | 0.84                  | 0.44                          | 1.85                  | 0.23                          | 0.278917              | 0.25657             | 0.370277                |
| wt     | gfy   | 20200221 | 0.2      | 42                 | 212             | 45                          | 2569            | 2.8                  | 1.5                  | 1.6                    | 0.22                   | 3.21             | 0.41                          | 0.41                    | 0.274                | 0.084                | 0.961                | 0.042                  | 0.84                  | 0.41                          | 1.98                  | 0.45                          | 0.284915              | 0.25657             | 0.370277                |
| wt     | glu   | 20191020 | 0.13     | 21                 | 56              | 31                          | 506             | 1.56                 | 0.97                 | 2.17                   | 0.98                   | 4.1              | 1.4                           | 1.4                     | 0.47                 | 0.15                 | 0.945                | 0.061                  | 1.11                  | 0.27                          | 1.44                  | 0.29                          | 0.53244               | 0.588624            | 0.849204                |
| wt     | glu   | 20200314 | 0.13     | 17                 | 33              | 10                          | 341             | 1.21                 | 0.53                 | 1.67                   | 0.25                   | 3.3              | 1.2                           | 1.2                     | 0.57                 | 0.14                 | 0.951                | 0.069                  | 0.88                  | 0.47                          | 1.66                  | 0.32                          | 0.644807              | 0.588624            | 0.849204                |
| wt     | glu   | 20190818 | 0.083    | 12                 | 83              | 41                          | 1179            | 0.63                 | 0.3                  | 2.61                   | 0.79                   | 4.9              | 1.3                           | 1.3                     | 1.07                 | 0.27                 | 0.977                | 0.042                  | 1.04                  | 0.22                          | 0.73                  | 0.28                          | 1.244227              | 1.22223             | 1.76331                 |
| wt     | glu   | 20190828 | 0.083    | 13                 | 194             | 66                          | 29              | 3032                 | 0.67                 | 0.36                   | 2.47                   | 0.68             | 4.7                           | 1.3                     | 1.04                 | 0.28                 | 0.977                | 0.042                  | 0.96                  | 0.24                          | 0.79                  | 0.31                          | 1.171849              | 0.588624            | 0.849204                |
| wt     | glu   | 20200321 | 0.083    | 15                 | 140             | 72                          | 36              | 2382                 | 0.63                 | 0.32                   | 2.33                   | 0.74             | 4.4                           | 1.3                     | 1.09                 | 0.28                 | 0.976                | 0.031                  | 1.01                  | 0.41                          | 1.15                  | 0.48                          | 1.250625              | 0.588624            | 0.849204                |
| Zball  | gfy   | 20200201 | 0.13     | 23                 | 92              | 7                           | 18              | 151                  | 5.8                  | 3.1                    | 1.58                   | 0.24             | 3.38                          | 0.49                    | 0.144                | 0.055                | 0.93                 | 0.12                   | 0.9                   | 0.22                          | 1.91                  | 0.37                          | 0.13496               | 0.143491            | 0.207013                |
| Zball  | gfy   | 20200212 | 0.13     | 22                 | 63              | 4                           | 15              | 106                  | 5.5                  | 2.4                    | 1.88                   | 0.65             | 3.9                           | 1                       | 0.166                | 0.055                | 0.932                | 0.038                  | 1.14                  | 0.93                          | 2.19                  | 0.39                          | 0.13496               | 0.143491            | 0.207013                |
| Zball  | gfy   | 20200221 | 0.2      | 26                 | 448             | 30                          | 92              | 1115                 | 4.9                  | 2.2                    | 1.88                   | 0.65             | 3.9                           | 1                       | 0.166                | 0.052                | 0.955                | 0.038                  | 1.14                  | 0.93                          | 2.19                  | 0.39                          | 0.13496               | 0.143491            | 0.207013                |
| Zball  | glu   | 20191020 | 0.13     | 20                 | 366             | 108                         | 75              | 1647                 | 2.3                  | 1.3                    | 2.8                    | 2.3              | 5.5                           | 3.6                     | 0.321                | 0.093                | 0.949                | 0.077                  | 1.34                  | 0.34                          | 2.23                  | 0.44                          | 0.351295              | 0.420874            | 0.607193                |
| Zball  | glu   | 20191111 | 0.13     | 22                 | 249             | 59                          | 61              | 2069                 | 1.5                  | 0.81                   | 1.81                   | 0.65             | 3.6                           | 1.2                     | 0.49                 | 0.15                 | 0.946                | 0.066                  | 1.48                  | 0.83                          | 1.95                  | 0.45                          | 0.53284               | 0.420874            | 0.607193                |
| Zball  | glu   | 20200314 | 0.13     | 9.2                | 284             | 34                          | 54              | 517                  | 2.1                  | 1                      | 2.6                    | 1.8              | 4.7                           | 2.7                     | 0.314                | 0.086                | 0.93                 | 0.093                  | 1.14                  | 0.5                           | 1.87                  | 0.34                          | 0.378487              | 0.634543            | 0.915452                |
| Zball  | glu   | 20190818 | 0.083    | 10                 | 172             | 20                          | 31              | 776                  | 1.28                 | 0.54                   | 2.1                    | 1.3              | 4.1                           | 1.3                     | 0.58                 | 0.19                 | 0.958                | 0.052                  | 1.28                  | 0.43                          | 1.42                  | 0.38                          | 0.614416              | 0.634543            | 0.915452                |
| Zball  | glu   | 20190828 | 0.083    | 15                 | 277             | 51                          | 33              | 1824                 | 1.37                 | 0.59                   | 1.71                   | 0.96             | 3.4                           | 1.6                     | 0.54                 | 0.2                  | 0.933                | 0.071                  | 1.23                  | 0.46                          | 1.48                  | 0.35                          | 0.564831              | 0.634543            | 0.915452                |
| Zball  | glu   | 20200321 | 0.083    | 15                 | 160             | 40                          | 41              | 1150                 | 1.06                 | 0.43                   | 2.6                    | 1.9              | 5                             | 2.8                     | 0.66                 | 0.13                 | 0.972                | 0.04                   | 1.44                  | 0.49                          | 1.62                  | 0.32                          | 0.724983              | 0.634543            | 0.915452                |
